# Supplementary material for: Effects of Exercise and Nutritional Intervention on Body Composition, Metabolic Health, and Physical Performance in Adults with Sarcopenic Obesity: A Meta-Analysis
Source: PubMed Central journal article supplement (PMC6770949; doi:10.3390/nu11092163), 2019-09-09
Supplement: nutrients-11-02163-s001.pdf [file nutrients-11-02163-s001.pdf]

**Table 1.** Databases search process.

| <b>Databases</b> | <b>PubMed, Scopus, Clinical key and Cochrane Library</b>    |
|------------------|-------------------------------------------------------------|
| Steps            | Search terms for query                                      |
| #1               | "Sarcopenia" OR "sarcopenic"                                |
| #2               | "obese" OR "obesity" OR "obestic" OR "overweight"           |
| #3               | "exercise" OR "training" OR "physical"                      |
| #4               | "nutrition" OR "restriction" OR "diet" OR "supplementation" |
| #5               | "#1" AND "#2" AND "#3"                                      |
| #6               | "#1" AND "#2" AND "#4"                                      |
| #7               | "#1" AND "#2" AND "#3" AND "#4"                             |

**Table 2.** Exercise protocols.

| Study                  | Exercise types                                                     | Intensity                                   | Duration                                            | Frequency (times/wk) | Period (weeks) |
|------------------------|--------------------------------------------------------------------|---------------------------------------------|-----------------------------------------------------|----------------------|----------------|
| Chen HT., 2017         | AE: Aerobic dance                                                  | Moderate intensity                          | 60 minutes                                          | 2                    | 8              |
| Balachandran A., 2014  | RE: Whole body major muscle groups                                 | 70% of 1RM                                  | 10–12 repetitions, 3 sets                           | 2                    | 15             |
| Chen HT., 2017         | RE: Whole body major muscle groups                                 | 60-70% of 1RM                               | 8-12 repetitions, 3 sets                            | 2                    | 8              |
| Chiu SC., 2018         | RE: Whole body major muscle groups                                 | 2-5 lbs                                     | 4-10 repetitions, 3 sets                            | 2                    | 12             |
| Huang SW., 2017        | RE: Whole body major muscle groups                                 | 13 points on the RPE scale                  | 10 repetitions, 3 sets                              | 3                    | 12             |
| Liao CD., 2017         | RE: Whole body major muscle groups                                 | 13 points on the RPE scale                  | 10 repetitions, 3 sets                              | 3                    | 12             |
| Liao CD., 2018         | RE: Whole body major muscle groups                                 | 13 points on the RPE scale                  | 10 repetitions, 3 sets                              | 3                    | 12             |
| Maltasis ML., 2016     | RE: Whole body major muscle groups                                 | 80% of 1RM                                  | 8 repetitions, 3 sets                               | 3                    | 16             |
| Nabuco HCG., 2019      | RE: Whole body major muscle groups                                 | 70% of 1RM                                  | 8-12 repetitions, 3 sets                            | 3                    | 12             |
| Vasconcelos KSS., 2016 | RE: Lower extremity muscle groups                                  | 50-75% of 1RM                               | 8-12 repetitions, 2-3 sets                          | 2                    | 10             |
| Chen HT., 2017         | CE: AE (dance steps)<br>RE (whole body major muscle groups)        | AE: Moderate intensity<br>RE: 60~70% of 1RM | AE: 60 minutes<br>RE: 8-12 repetitions, 3 sets      | AE: 1<br>RE: 1       | 8              |
| Kim H., 2016           | CE: AE (stationary bicycle)<br>RE (whole body major muscle groups) | AE: up to 40 watts<br>RE: NA                | AE: 12 minutes<br>RE: 10 repetitions, 3 sets        | AE: 2<br>RE: 2       | 12             |
| Park J., 2017          | CE: AE (walking activities)<br>RE (whole body major muscle groups) | AE: 13-17 points on the RPE scale<br>RE: NA | AE: 30-50 minutes<br>RE: 8-15 repetitions, 2-3 sets | AE: 5<br>RE: 3       | 24             |
| Balachandran A., 2014  | PT: Whole body major muscle group                                  | Maximal power outputs                       | 10–12 repetitions, 3 sets                           | 2                    | 15             |

AE: aerobic exercise; CE: combined exercise; NA: not available; PT: power training; RE: resistance exercise; RPE: rating of perceived exertion; 1RM: one repetition maximum.

**Table 3.** Protocols of nutritional intervention.

| <b>Study</b>               | <b>Type of Intervention</b> | <b>Description of Interventions</b>                                       |
|----------------------------|-----------------------------|---------------------------------------------------------------------------|
| Aubertin-Leheudre M., 2007 | Supplementation             | Isoflavone (70 mg/day)                                                    |
| Kim H., 2016               | Supplementation             | AA (3 g/day) and catechin (540 mg /day)                                   |
| Kemmler W., 2017           | Supplementation             | Protein supplementation (1.7-1.8 g/BW(kg)/day) and vitamin D (800 IU/day) |
| Maltasis ML., 2016         | Supplementation             | Protein shake (12 g) immediate after exercise                             |
| Nabuco HCG., 2019          | Supplementation             | Hydrolyzed whey protein (35 g) immediate after exercise                   |
| Muscariello E., 2016       | LCHP                        | LC (20-25 kcal/IBW(kg)/day) and HP (1.2 g/IBW(kg)/day)                    |
| Sammarco R., 2017          | LCHP                        | LC (90% of daily energy requirement) and HP (1.2-1.4 g/BW(kg)/day)        |
| Muscariello E., 2016       | LCNP                        | LC (20-25 kcal/IBW(kg)/day) and NP (0.8 g/IBW(kg)/day)                    |
| Sammarco R., 2017          | LCNP                        | LC (90% of daily energy requirement) and NP (0.8-1.0 g/BW(kg)/day)        |

AA: amino acid; BW: body weight; HP: high protein; IBW: ideal body weight; LC: low calorie; LCHP: low calorie plus high protein; LCNP: low calorie plus normal protein; NP: normal protein.

**Table 4.** The PEDro score of included studies.

| Study                       | Eligibility Criteria Were Specified | (1) | (2) | (3) | (4) | (5) | (6) | (7) | (8) | (9) | (10) | Total |
|-----------------------------|-------------------------------------|-----|-----|-----|-----|-----|-----|-----|-----|-----|------|-------|
| Aubertin-Leheudre, M., 2007 | Y                                   | Y   | Y   | Y   | Y   | Y   | Y   | N   | N   | Y   | Y    | 8     |
| Balachandran, A., 2014      | Y                                   | Y   | N   | N   | N   | N   | Y   | N   | N   | Y   | Y    | 4     |
| Chen, H. T., 2017           | Y                                   | Y   | N   | Y   | N   | N   | Y   | N   | N   | Y   | Y    | 5     |
| Chiu, S. C., 2018           | Y                                   | N   | N   | Y   | N   | N   | Y   | N   | N   | Y   | Y    | 4     |
| Huang, S. W., 2017          | Y                                   | Y   | Y   | Y   | N   | N   | Y   | Y   | N   | Y   | Y    | 7     |
| Kemmler, W., 2017           | Y                                   | Y   | Y   | Y   | N   | N   | Y   | Y   | Y   | Y   | Y    | 8     |
| Kim, H., 2016               | Y                                   | Y   | Y   | Y   | N   | N   | N   | Y   | N   | Y   | Y    | 6     |
| Liao, C. D., 2017           | Y                                   | Y   | N   | Y   | N   | Y   | Y   | Y   | Y   | Y   | Y    | 8     |
| Liao, C. D., 2018           | Y                                   | Y   | Y   | Y   | N   | Y   | Y   | Y   | Y   | Y   | Y    | 9     |
| Maltais, M. L., 2016        | Y                                   | Y   | N   | N   | Y   | N   | Y   | Y   | N   | Y   | Y    | 6     |
| Muscariello, E., 2016       | Y                                   | Y   | N   | Y   | N   | N   | Y   | Y   | N   | Y   | Y    | 6     |
| Nabuco H. C. G., 2019       | Y                                   | Y   | Y   | Y   | Y   | N   | Y   | Y   | N   | Y   | Y    | 8     |
| Park, J., 2017              | Y                                   | Y   | N   | Y   | Y   | N   | Y   | Y   | N   | Y   | Y    | 7     |
| Sammarco, R., 2017          | Y                                   | Y   | N   | Y   | N   | N   | N   | Y   | N   | Y   | Y    | 5     |
| Vasconcelos, K. S., 2016    | Y                                   | Y   | Y   | Y   | N   | N   | Y   | Y   | Y   | Y   | Y    | 8     |

(1) random allocation, (2) concealed allocation, (3) similar at baseline, (4) participants blinding, (5) therapists blinding, (6) assessors blinding, (7) adequate follow up, (8) intention to treat analysis, (9) between group statistic analysis, (10) point and variability measurement.

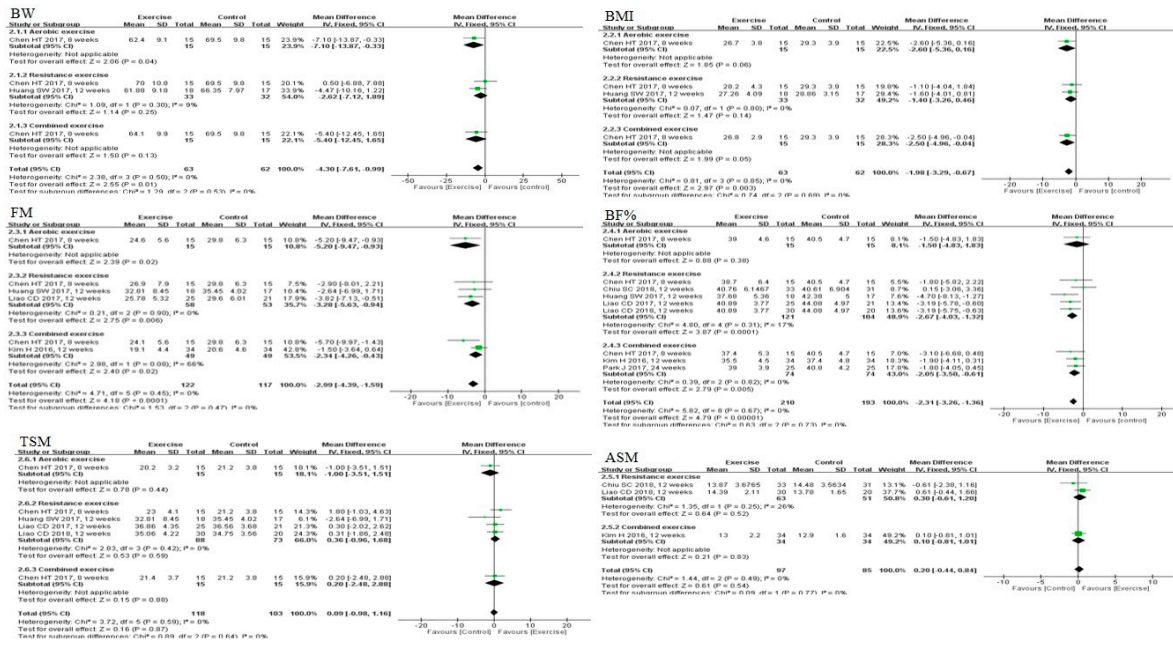

**Figure 1.** Forest plots of comparisons between exercise and the control group for the parameters of body composition in individuals with sarcopenic obesity. ASM: appendicular skeletal muscle mass; BF%: body fat percentage; BMI: body mass index; BW: body weight; FM: total fat mass; TSM: total skeletal muscle mass.

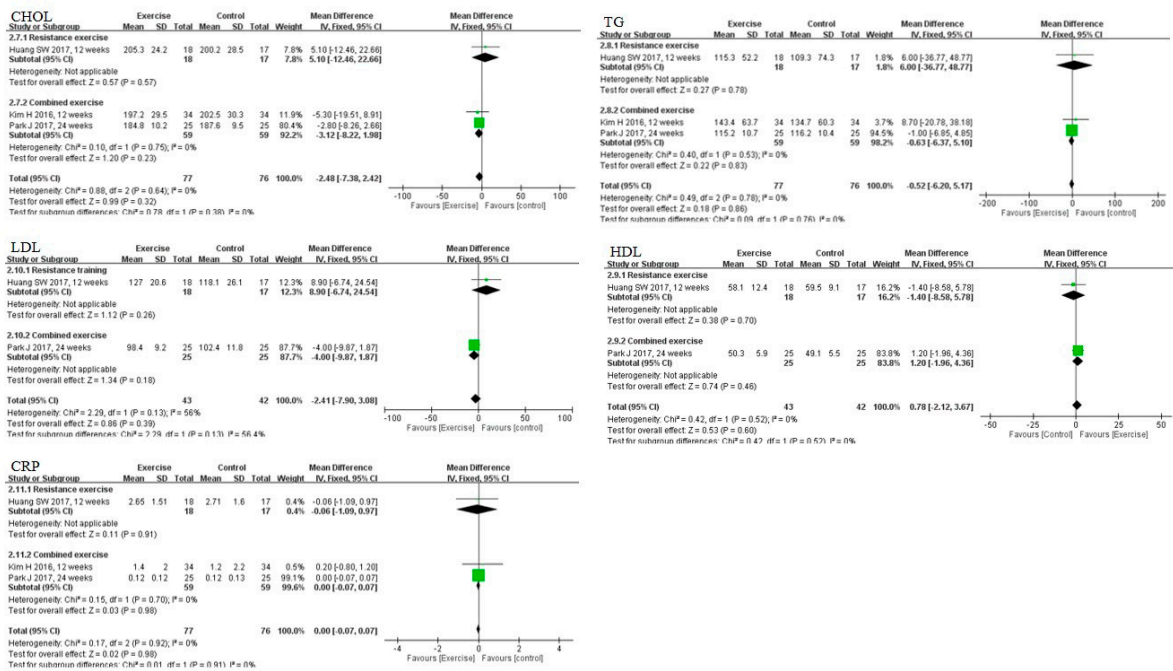

**Figure 2.** Forest plots of comparisons between exercise and the control group for lipid profiles and C-reactive protein (CRP) in individuals with sarcopenic obesity. CHOL: total cholesterol; HDL: high density lipoprotein; LDL: low density lipoprotein; TG: triglycerides.

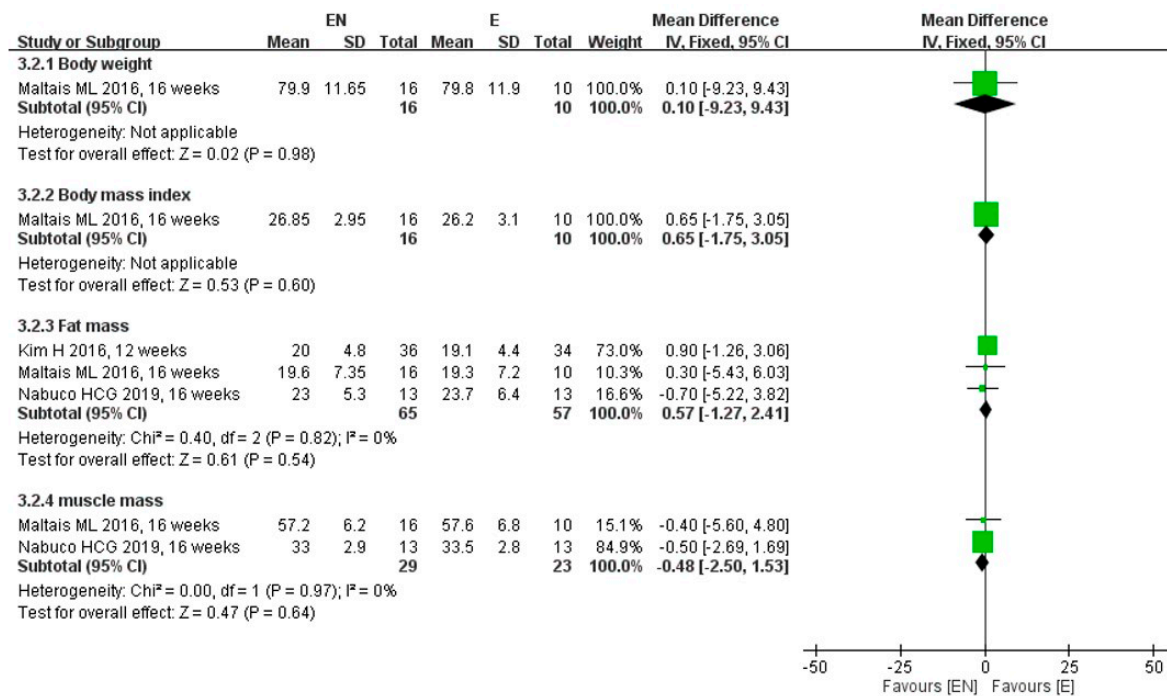

**Figure 3.** Forest plots of comparisons between exercise plus nutrition (EN) and exercise alone (E) for the parameters of body composition in individuals with sarcopenic obesity.

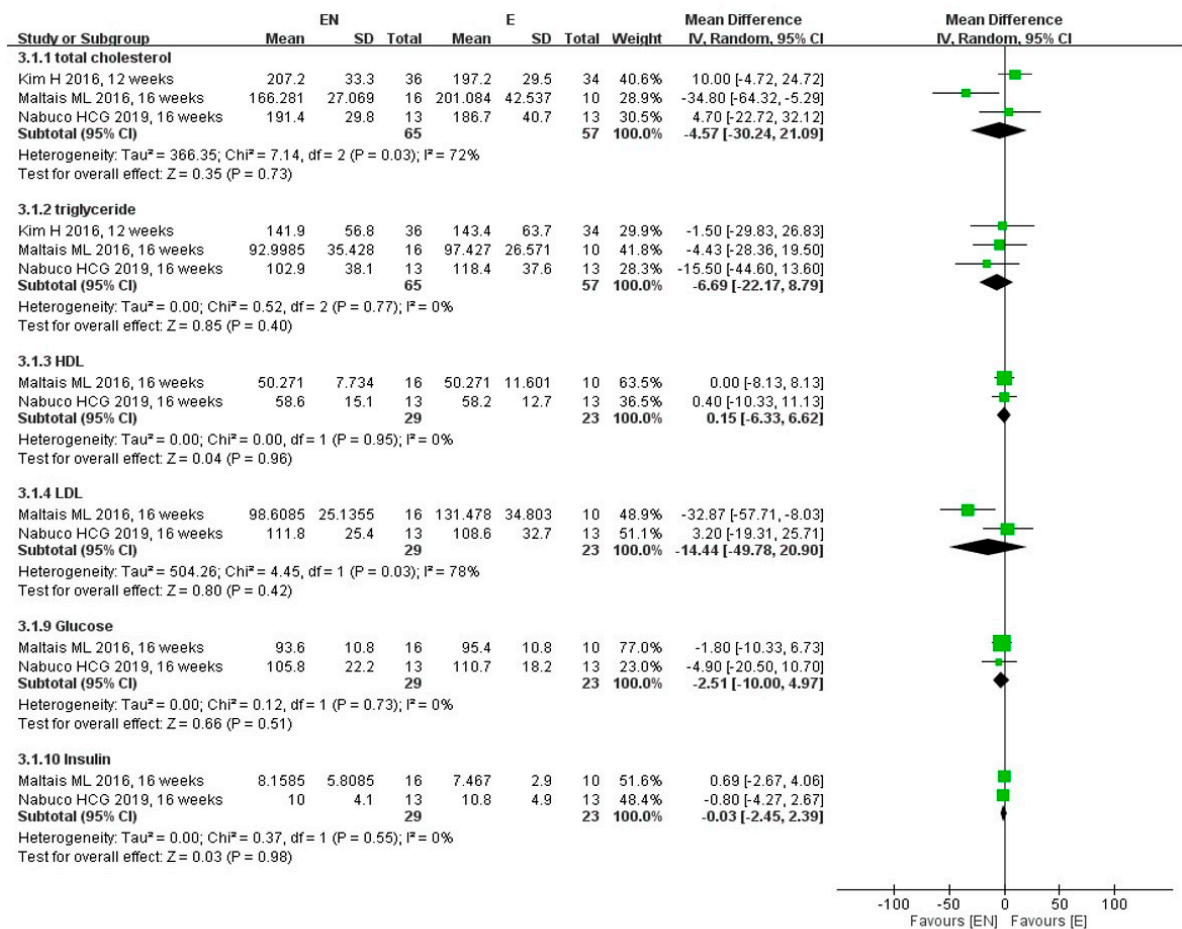

**Figure 4.** Forest plots of comparisons between exercise plus nutrition (EN) and exercise alone (E) for the parameters of metabolic health in individuals with sarcopenic obesity. HDL: high density lipoprotein; LDL: low density lipoprotein.

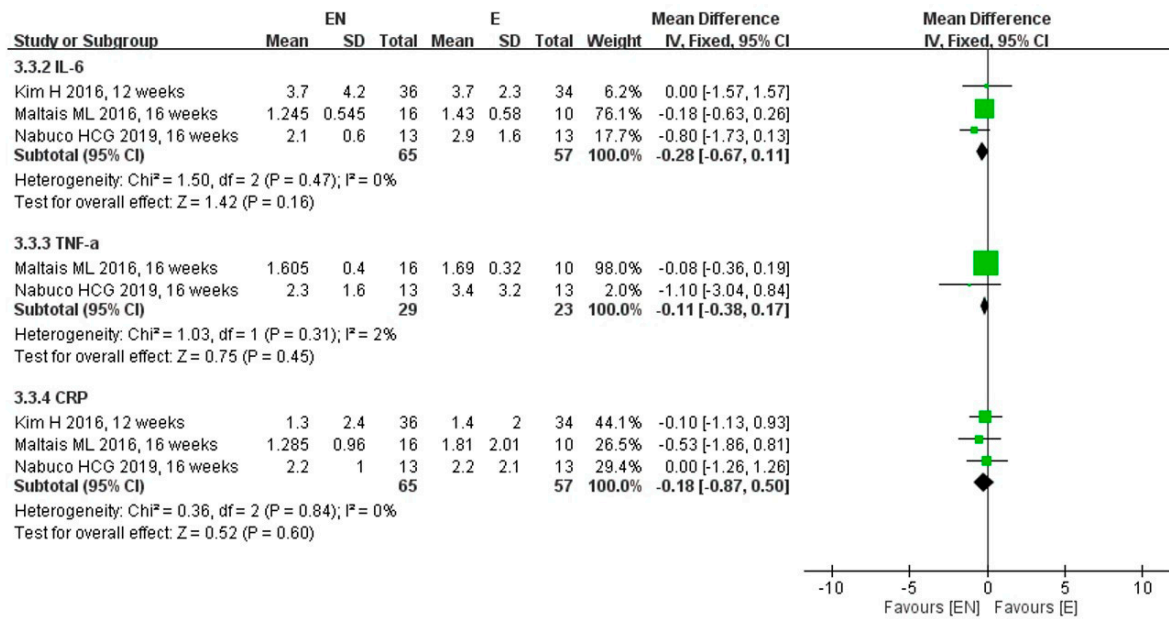

**Figure S5.** Forest plots of comparisons between exercise plus nutrition (EN) and exercise alone (E) for inflammatory biomarkers in individuals with sarcopenic obesity. IL-6: Interleukin-6; TNF-a: Tumor necrosis factor-alpha; CRP: C-reactive protein.
